# Supplementary material
Source: PubMed Central journal article supplement (PMC5741586)
Supplement: 12192_2017_829_MOESM7_ESM.pdf [file 12192_2017_829_MOESM7_ESM.pdf]

## LEGENDS OF SUPPLEMENTAL FIGURES

### **Supplemental Figure 1. EtOH exposure does not affect the viability and morphology of 1C11 cells**

**a.** Absorbance (450 nm) of 1C11 cells grown in 96-well plates, treated with 300 mM EtOH for 16h or 24h, and incubated with the XTT assay solution. Absorbance is represented in arbitrary units and is proportional to the amount of viable cells in the sample.

**b.** Phase contrast pictures of 1C11 cells in control conditions or treated with 300 mM EtOH for 8h (scale bar: 20  $\mu$ m).

### **Supplemental Figure 2. Range of EtOH concentrations that activate the HSF pathway in 1C11 cells**

**a.** HSF1 and HSF2 activity in unstressed and EtOH-treated 1C11 cells. Gel-shift analysis (EMSA) of HSF1 and HSF2 DNA-binding activity in 1C11 cells in control conditions and exposure to 150 mM for 2h, 4h, 6h, or 8h or to 300 mM EtOH for 4h or 6h, or untreated (CTR). The presence of HSF1 or HSF2 in the HSF-HSE complex was analyzed by supershifting with anti-HSF1 ( $\alpha$ 1; arrowhead) or anti-HSF2 antibodies ( $\alpha$ 2). 1C11 control cells exhibit a low constitutive HSF1 activity. In response to EtOH exposure, both HSF1 and HSF2 activities are increased by EtOH exposure as shown by supershifting of the HSE-HSF complex by anti-HSF1 or disruption of the HSE-HSF complex by anti-HSF2 antibodies. CHBA: constitutive HSE-binding activity, which is not carried by HSFs (Abravaya et al. 1991; Mosser et al. 1988); ns: non-specific DNA-protein complex; free: unbound double-stranded HSE oligonucleotide. Control human neuroblastoma cells SHSY-5Y heat-shocked SHSY-5Y and iMEFs were used a positive control for HSF2 and HSF1 DNA-binding activity, respectively.

**b.** *Hsp70* mRNA levels in 1C11 cells exposed to 150 mM or 300 mM EtOH for 2h, 4h, 6h, or 8h. RNA preparations were assayed for *Hsp70* mRNA. Results from RT-qPCR assays are shown as the average *Hsp70* mRNA level  $\pm$  SEM over unstimulated cells in 3 independent experiments, normalized to *hmbs* and *Rpl13a* levels. One-way ANOVA followed by adjustment for multiple comparisons using Dunnett's method was performed: \*  $p < 0,05$ , \*\*  $p < 0,01$ , \*\*\*  $p < 0,001$  vs 0h.

**c.** Immunoblot analysis of HSP70 protein levels in nuclear extracts of 1C11 cells treated with EtOH (300 mM) for 8h or 16h. GAPDH was used as an internal loading control. A representative immunoblot of 3 independent experiments is shown

### **Supplemental Figure 3. EtOH exposure increases *Dnmt* transcript levels in 1C11 neural precursors**

**a.** *Dnmt* mRNA levels in 1C11 cells exposed to 150 mM of EtOH for 2h, 4h, 6h, and 8h. RNA preparations were assayed by RT-qPCR for *Dnmt1*, *Dnmt3a*, *Dnmt3b*, *Dnmt3l* mRNAs. Results are shown as the average *Dnmt* mRNA levels over unstimulated cells  $\pm$  SEM in 3 independent

experiments, normalized to *hprt1* and *pgk1* levels. One-way ANOVA followed by adjustment for multiple comparisons using Dunnett's method was performed: \*  $p < 0.05$ , \*\*\*  $p < 0.001$  vs 0h.

**b.** Comparison of *Dnmt3a1*, *Dnmt3a2*, *Dnmt3b* and *Dnmt3l* mRNA levels in 1C11 cells exposed to 300 mM EtOH for 8h. Cycles obtained from RT-qPCR analysis of a representative experiment were used to estimate the relative abundance of the *Dnmt* transcripts.

**Supplemental Figure 4. EtOH exposure augments *Tet1*, *Tet2* and *Tet3* transcript, but not protein levels in 1C11 cells.**

**a.** *Tet* mRNA levels in 1C11 cells exposed to 150 mM or 300 mM EtOH for 2h, 4h, 6h or 8h. RNA preparations were assayed by RT-qPCR for *Tet1*, *Tet2*, *Tet3* mRNA. Results are shown as the mean *Tet* mRNA levels over unstimulated cells (ctrl)  $\pm$  SEM in 2 independent experiments, normalized against *hmbs* and *Rpl13a* levels.

**b.** Immunoblot analysis of TET protein levels in nuclear extracts of 1C11 cells treated with EtOH (300 mM) for 8h, 16h or 24h. Beta-ACTIN was used as an internal loading control. A representative immunoblot of 2 independent experiments is shown.

**Supplemental Figure S5. mRNA levels of epigenetic factors in primary *Hsf1*<sup>WT</sup> and *Hsf1*<sup>-/-</sup> MEF exposed to ethanol.**

mRNA levels of epigenetic modifiers in primary *Hsf1*<sup>WT</sup> and *Hsf1*<sup>-/-</sup> MEF exposed to 430 mM EtOH for 8h. RNA preparations were assayed by RT-qPCR for epigenetic enzymes, which were found among the HSF1 or HSF2 targets in CHIP-seq analyses (see [Online Resource 2](#), [Suppl. Table 2](#)). Results are shown as the mean mRNA levels  $\pm$  SD over unstimulated WT cells of 2 independent experiments, normalized to *B2m* and *cyclophilin* levels. The sole gene whose regulation is HSF-dependent is *Kdm6a* ( $n=5$  for this gene). One-way ANOVA followed by adjustment for multiple comparisons using Sidak's method was performed: \*  $p < 0,05$ .

**Supplemental Figure S6. The increase in *Dnmt3a* mRNA levels upon EtOH treatment is not abolished by inhibition of NADPH oxidase.**

**a.** *Dnmt3a* mRNA levels in 1C11 cells exposed to 300 mM EtOH for 6h, in the presence of DMSO or 4  $\mu$ M DPI. RNA preparations were assayed by RT-qPCR for *Dnmt3a* mRNA. Results are shown as the average *Dnmt* mRNA levels  $\pm$  SEM over unstimulated cells in 4 independent experiments, normalized to *hprt1* and *rpl13a* levels. One-way ANOVA followed by adjustment for multiple comparisons using Sidak's method was performed: \*\*\*  $p < 0,001$ .

**b.** Immunoblot analysis of DNMT3A1, AKT, and phospho-Serine473-AKT levels in nuclear extracts of WT MEFs exposed or not to EtOH for 16h or 24h at 430 mM.

**c.** Immunoblot analysis of AKT, and phospho-Serine473-AKT levels in total extracts of 1C11 cells exposed or not to EtOH for 16 h at 300 mM.

## SUPPLEMENTARY INFORMATION

### Supplementary Materials and Methods

#### Electrophoretic mobility shift assay

Whole cell extracts were prepared as previously described (Mezger et al. 1989) and incubated with a (32P)-labeled HSE oligonucleotide (5'-CTAGAACGTTCTAGAAGCTTCGAGA-3'). Complexes were separated on a native 4% gel polyacrylamide gel as described (Rallu et al. 1997). The components of the retarded complexes were analyzed by supershift using antibodies against HSF1 (Ab4 Neomarker; 1:150 final dilution) or HSF2 (rabbit polyclonal H57; kind gift from Lea Sistonen Lab; 1:100 final dilution).

#### References related to supplemental information

Abravaya K, Phillips B, Morimoto RI (1991) Attenuation of the heat shock response in HeLa cells is mediated by the release of bound heat shock transcription factor and is modulated by changes in growth and in heat shock temperatures. *Genes Dev* 5:2117–2127.

Charos AE, Reed BD, Raha D, et al (2012) A highly integrated and complex PPARGC1A transcription factor binding network in HepG2 cells. *Genome Res* 22:1668–1679. doi: 10.1101/gr.127761.111

Mendillo ML, Santagata S, Koeva M, et al (2012) HSF1 drives a transcriptional program distinct from heat shock to support highly malignant human cancers. *Cell* 150:549–562. doi: 10.1016/j.cell.2012.06.031

Mezger V, Bensaude O, Morange M (1989) Unusual levels of heat shock element-binding activity in embryonal carcinoma cells. *Mol Cell Biol* 9:3888–3896.

Mosser DD, Theodorakis NG, Morimoto RI (1988) Coordinate changes in heat shock element-binding activity and HSP70 gene transcription rates in human cells. *Mol Cell Biol* 8:4736–4744.

Rallu M, Loones M, Lallemand Y, et al (1997) Function and regulation of heat shock factor 2 during mouse embryogenesis. *Proc Natl Acad Sci U S A* 94:2392–2397.

Vihervaara A, Sergelius C, Vasara J, et al (2013) Transcriptional response to stress in the dynamic chromatin environment of cycling and mitotic cells. *Proc Natl Acad Sci U S A* 110:E3388–3397. doi: 10.1073/pnas.1305275110

**Supplementary Table 1. Primers used for RT-qPCR experiments**

|                                     | Primer - F               | Primer - R             |
|-------------------------------------|--------------------------|------------------------|
| <b>Epigenetic actors</b>            |                          |                        |
| <b>DNA methylation</b>              |                          |                        |
| <i>Dnmt1</i>                        | CGTTGTGGTGGATGACAAGA     | GAACCAGGACAGTGGCTCT    |
| <i>Dnmt3a</i>                       | GTGCAGAAACATCGAGGACA     | ATGCCTCCAATGAAGAGTGG   |
| <i>Dnmt3b</i>                       | ACAACCGTCCATTCTTCTGG     | GTGAGCAGCAGACACCTTGA   |
| <i>Dnmt3l</i>                       | CTGCTGACTGAGGATGACCA     | ACCCGCATAGCATTCTGGTA   |
| <b>DNA demethylation</b>            |                          |                        |
| <i>Tet1</i>                         | AACTGGCTTCTGTGAGGTG      | TCGGCGTAGATCTCCTCACT   |
| <i>Tet2</i>                         | TGCCTCCAGATCACCATAACA    | TGCCGTGTAGCTGTAGATCG   |
| <i>Tet3</i>                         | CTTGCCAGGCTTTGTCTAGC     | TTGACTGGTCCCAGCCTAAC   |
| <b>Histone/Lysine acetylation</b>   |                          |                        |
| <i>Ncoa3</i>                        | GGCAGGCACTTGAAATGAAA     | GCCATTTGGGCATTAAGAA    |
| <b>Histone/Lysine deacetylation</b> |                          |                        |
| <i>Hdac4</i>                        | CACACCTCTTGAGGGTACAA     | GATGGCTGTCAGGTCATGG    |
| <i>Hdac5</i>                        | GTGACACGGTGTGGAATGAG     | CCGGATGATAGCAAATCCAT   |
| <i>Hdac7</i>                        | GAGGCCTGTGTAGCTGCTCT     | GGCACTGAGGTTGGGTTTCT   |
| <i>Hdac9</i>                        | CCTGCCCAATATCACTCTGG     | GCATCTGTGTCTCGCACTTC   |
| <i>Hdac11</i>                       | TCATGGGTGACAAGCGAGTA     | CCTGATGGCCTCTTTAGCAA   |
| <b>Histone/Lysine methylation</b>   |                          |                        |
| <i>Dot1l</i>                        | CAACTGTTGCTGGCCTCTTT     | GTGATCTCCAGTGGCTGGTT   |
| <i>Ehmt1</i>                        | ATTGACGCTCGGTTCTATGG     | AATCAGGCGGGTACTGAAGA   |
| <i>Prmt2</i>                        | CACCACACACTGGAAGCAGA     | AACAGAACCCGTGACCACAT   |
| <i>Prmt3</i>                        | GAAGAAGTGAGTCTTCTGTGGA   | GGACAGAATCCAACATCGACT  |
| <i>Setd5</i>                        | GAGTCCCATCTGCTCCTCAG     | CCCACCAGAATTCTCCTTAGC  |
| <b>Histone demethylation</b>        |                          |                        |
| <i>Jarid2</i>                       | CAAAGCAACCACCAACAATG     | TTCTCCCGTGCTGACCTACT   |
| <i>Jmjd6</i>                        | TGACCTCCAGGAGTCCACA      | TCTGAGTCCGAGTCTGACGA   |
| <i>Kdm1a</i>                        | GGCCATTCTCAAAGGGATTT     | GGATCCTGCAGCCACATAAG   |
| <i>Kdm3a</i>                        | TGAGAAAGCGCCTCTATCAAG    | GCTCCTGCTGGGATAAACAC   |
| <i>Kdm4b</i>                        | GATGACTGGCCCTATGTGGT     | GCGATAGTAGAGCCATTGC    |
| <i>Kdm6a</i>                        | TTGTAGTATTTGTGAGGTGGAGGT | GTGCACAATCTTGCAATGT    |
| <i>Kdm6b</i>                        | AAGAGCTGGTGCTGAGCAAG     | GGCTGCCATTCTCACTTGTA   |
| <i>Kdm8</i>                         | GGGCTCAAGGTACACAGATGA    | AAGAGCTGGTGCTGAGCAAG   |
| <i>Smyd3</i>                        | GGAGGTTCAAGAGTCGCTGA     | CCGGTTGGAATTGCTGTTTA   |
| <b>Heat Shock Pathway</b>           |                          |                        |
| <i>Hsp70</i>                        | GGCCACATTGTTGATACATGC    | CTACAGTGCAACCACCATGC   |
| <b>Reference genes</b>              |                          |                        |
| <i>B2m</i>                          | AGAATGGGAAGCCGAACATA     | CGTTCCTCAGCATTGGATT    |
| <i>Cyclophilin</i>                  | TGCCATCCAGCCAGGAGGTC     | CCATCGTGCATCAAGGACTT   |
| <i>Hmbs</i>                         | GCTGAAAGGGCTTTTCTGAG     | TGCCCATCTTTCATCACTGT   |
| <i>Hprt1 3'</i>                     | TGTCAGTTGCTGCGTCCCCAGA   | TCTACCAGAGGGTAGGCTGGCC |
| <i>Hprt1 5'</i>                     | GCCATTGCTGAGGCGGCGAG     | CCGGCGGAGGAGGTGCTACC   |
| <i>Pgk1</i>                         | ACCTGCTGGCTGGATGGGCT     | CTCGACCCACAGCCTCGGCA   |
| <i>Rpl13a</i>                       | CGGATGGTGGTCCCTGCTG      | GAGTGGCTGTCACTGCTGG    |

**Supplementary Table 2. Enzymes involved in epigenetic mechanisms, whose genes are potential HSF targets, identified in HSF1 and HSF2 ChIP seq data.**

| Symbol                              | RefSeq         | Description                                                   | HSF-ChIP-Seq |        |            |
|-------------------------------------|----------------|---------------------------------------------------------------|--------------|--------|------------|
|                                     |                |                                                               | Mendillo     | Charos | Vihervaara |
| <b>DNA methylation</b>              |                |                                                               |              |        |            |
| Dnmt1                               | NM_010066      | DNA methyltransferase 1                                       | +            | +      |            |
| Dnmt3a                              | NM_007872      | DNA methyltransferase 3A                                      |              | +      |            |
| Dnmt3b                              | NM_010068      | DNA methyltransferase 3B                                      | +            | +      | +          |
| Dnmt3l                              | NM_001081695.2 | DNA methyltransferase 3-like                                  | +            |        | +          |
| <b>DNA hydroxymethylation</b>       |                |                                                               |              |        |            |
| Tet1                                | NM_001253857.1 | Ten-eleven-translocation-methylcytosine dioxygenase 1         |              |        |            |
| Tet2                                | NM_001040400.2 | Ten-eleven-translocation-methylcytosine dioxygenase 2         |              |        |            |
| Tet3                                | NM_183138.2    | Ten-eleven-translocation-methylcytosine dioxygenase 3         | +            |        |            |
| <b>Histone/Lysine acetylation</b>   |                |                                                               |              |        |            |
| Atf2                                | NM_009715      | Activation transcription factor 2                             | +            |        |            |
| Cdyl                                | NM_009881      | Chromodomain protein, Y chromosome-like                       | +            |        |            |
| Csrp2bp                             | NM_181417      | Cysteine and glycine-rich protein 2 binding protein           |              | +      |            |
| Esco1                               | NM_001081222   | Establishment of cohesion homolog 1 ( <i>S. cerevisiae</i> )  |              |        | +          |
| Esco2                               | NM_028039      | Establishment of cohesion homolog 2 ( <i>S. cerevisiae</i> )  |              |        |            |
| Kat2A (GCN5)                        | NM_020004      | K(lysine) acetyltransferase 2A                                |              |        | +          |
| Kat7 (Myst2)                        | NM_177619      | MYST histone acetyltransferase 2                              | +            |        |            |
| Kat8 (Myst1)                        | NM_026370      | MYST histone acetyltransferase 1                              |              |        |            |
| Ncoa3                               | NM_008679      | Nuclear receptor coactivator 3                                | +            | +      |            |
| <b>Histone/Lysine deacetylation</b> |                |                                                               |              |        |            |
| Hdac2                               | NM_008229      | Histone deacetylase 2                                         | +            |        |            |
| Hdac4                               | NM_207225      | Histone deacetylase 4                                         |              | +      |            |
| Hdac5                               | NM_010412      | Histone deacetylase 5                                         | +            | +      |            |
| Hdac7                               | NM_019572      | Histone deacetylase 7                                         | +            |        | +          |
| Hdac8                               | NM_027382      | Histone deacetylase 8                                         |              |        |            |
| Hdac9                               | NM_024124      | Histone deacetylase 9                                         | +            |        | +          |
| Hdac11                              | NM_144919      | Histone deacetylase 11                                        |              | +      |            |
| <b>Histone/Lysine methylation</b>   |                |                                                               |              |        |            |
| Carm1                               | NM_021531      | Coactivator-associated arginine methyltransferase 1           |              |        |            |
| Kmt1b (Suv39h1)                     | NM_011514      | Suppressor of variegation 3-9 homolog 1 ( <i>Drosophila</i> ) |              |        |            |
| Kmt1c (Ehmt2, G9A)                  | NM_145830      | Euchromatin histone N-methyltransferase 2                     |              |        |            |
| Kmt1d (Ehmt1, GLP)                  | NM_172545      | Euchromatin histone methyltransferase 1                       | +            |        | +          |
| Kmt1e (Setdb1)                      | NM_018877      | SET domain, Bifurcated 1                                      | +            |        |            |
| Kmt1f (Setdb2)                      | NM_001081024   | SET domain, Bifurcated 2                                      | +            |        |            |
| Kmt2a (MLL)                         | NM_005933      | myeloid/lymphoid or mixed-lineage leukemia                    | +            |        | +          |
| (Kmt2c) Mll3                        | NM_001081383   | myeloid/lymphoid or mixed-lineage leukemia 3                  | +            |        |            |
| (Kmt2e) Mll5                        | XM_893956      | myeloid/lymphoid or mixed-lineage leukemia 5                  | +            |        |            |
| Kmt3a (Setd2)                       | NM_001081340   | SET domain containing 2                                       | +            |        |            |
| Kmt3b (Nsd1)                        | NM_008739      | Nuclear Receptor Binding SET Domain                           |              |        |            |

|                                                |                |                                                                    |   |   |   |
|------------------------------------------------|----------------|--------------------------------------------------------------------|---|---|---|
|                                                |                | Protein 1                                                          |   |   |   |
| Ktm3g<br>(Whsc1, NSD2)                         | NM_001081102   | Wolf-Hirshhorn syndrome candidate 1<br>(human)                     | + |   |   |
| Ktm4<br>(Dot1l)                                | NM_199322      | DOT1-like Histone H3 methyltransferase<br>( <i>S. cerevisiae</i> ) | + |   | + |
| Mllt1                                          | NM_022328.2    | myeloid/lymphoid or mixed-lineage<br>leukemia; translocated to, 1  | + |   |   |
| Mllt4                                          | NM_010806.13   | myeloid/lymphoid or mixed-lineage<br>leukemia; translocated to, 4  | + |   |   |
| Mllt6                                          | NM_139311.2    | myeloid/lymphoid or mixed-lineage<br>leukemia; translocated to, 6  | + | + |   |
| Prmt1                                          | NM_019830      | Protein arginine N-methyltransferase 1                             |   |   |   |
| Prmt2                                          | NM_133182      | Protein arginine N-methyltransferase 2                             |   | + | + |
| Prmt3                                          | NM_133740      | Protein arginine N-methyltransferase 3                             |   | + | + |
| Prmt5                                          | NM_013768      | Protein arginine N-methyltransferase 5                             |   | + |   |
| Setd4                                          | NM_145482      | SET domain containing 4                                            | + |   |   |
| Setd5<br>(KIAA1757)                            | NM_028385      | SET domain containing 5                                            | + | + |   |
| Setd6                                          | NM_001035123   | SET domain containing 6                                            |   |   |   |
| Setd7                                          | NM_080793      | SET domain containing (lysine<br>methyltransferase) 7              | + |   |   |
| Smyd1                                          | NM_009762      | SET and MYND domain containing 1                                   |   |   |   |
| Smyd3                                          | NM_027188      | SET and MYND domain containing 3                                   | + |   | + |
| Ktm5b<br>(Suv4-20h1)                           | NM_144871      | Suppressor of variegation 4-20 homolog<br>1 ( <i>Drosophila</i> )  | + |   |   |
| <b>Histone/Lysine demethylation</b>            |                |                                                                    |   |   |   |
| Kdm1a (AOF2,<br>KDM1, LSD1,<br>BHC110)         | NM_133872      | Lysine (K)-specific demethylase 1                                  | + |   | + |
| Kdm4c<br>(JHDM3C,<br>JMJD2C,<br>TDRD14C)       | NM_144787      | Lysine (K)-specific demethylase 4C                                 | + |   |   |
| Kdm5b<br>(JARID1B)                             | NM_152895      | Lysine (K)-specific demethylase 5B                                 | + |   |   |
| Kdm8 (JMJD5)                                   | NM_029842.5    | Lysine (K)-specific demethylase 8                                  | + | + |   |
| Jarid2 (JMJ)                                   | NM_001205043.1 | Jumonji, AT rich interactive domain 2                              | + |   | + |
| Kdm6a (UTX)                                    | NM_009483.1    | Lysine (K)-specific demethylase 6A                                 | + | + | + |
| Kdm4b<br>(JMJD2B,<br>TDRD14B)                  | NM_172132.2    | Lysine (K)-specific demethylase 4B                                 | + |   | + |
| Kdm3a<br>(JHDM2A,<br>JHMD2A,<br>JMJD1, JMJD1A) | NM_001038695.3 | Lysine (K)-specific demethylase 3A                                 | + | + |   |
| Kdm3b<br>(JMJD1B)                              | NM_001081256.1 | Lysine (K)-specific demethylase 3B                                 | + |   |   |
| Jmjd1c                                         | NM_001242396.1 | Lysine (K)-specific demethylase 1C                                 | + |   |   |
| Jmjd4                                          | NM_001205068.1 | Lysine (K)-specific demethylase 4                                  |   | + |   |
| Kdm5a<br>(JARID1A)                             | NM_145997.2    | Lysine (K)-specific demethylase 5A                                 | + |   |   |
| Kdm6b (JMJD3)                                  | NM_001017426   | KDM1 Lysine (K)-specific demethylase 6B                            | + | + | + |

Enzymes involved in chromatin remodeling that were found among the HSF1 or HSF2 targets identified in CHIP-seq analyses from Charos et al. (2012), Mendillo et al. (2012), and Vihervaara et al. (2013). A plus indicates that the gene is bound by HSFs. The genes chosen for qPCR analysis are present in at least two CHIP-seq analyses and are highlighted in yellow.
