# Supplementary material
Source: PubMed Central journal article supplement (PMC5741586)

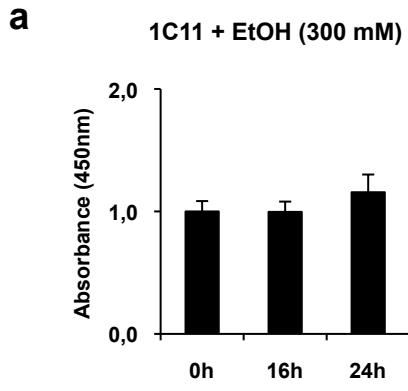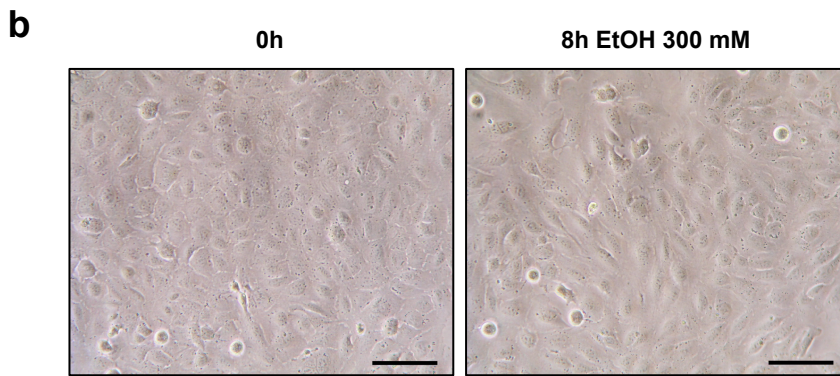

Supplement: 12192_2017_829_MOESM1_ESM.pdf [file 12192_2017_829_MOESM1_ESM.pdf]

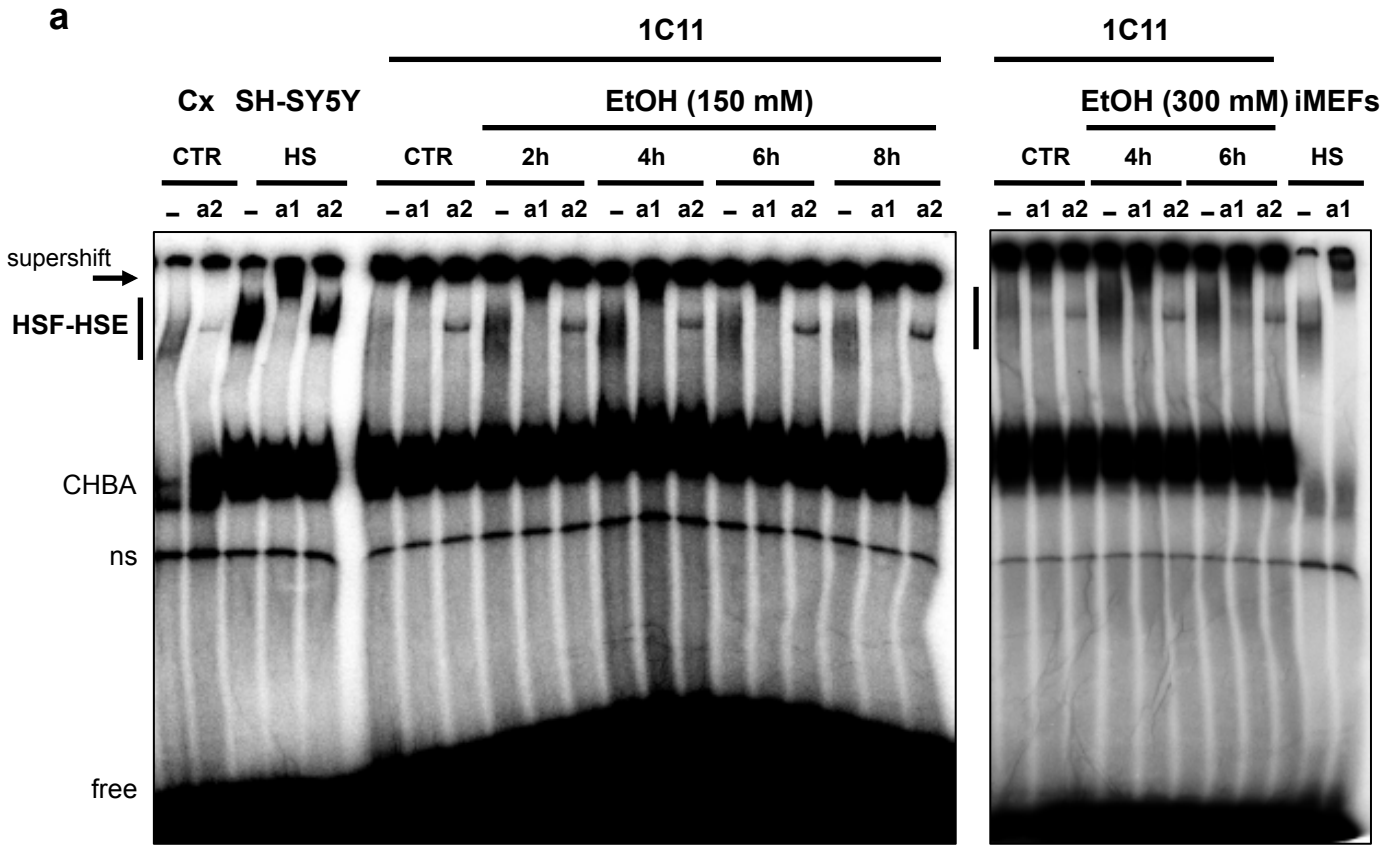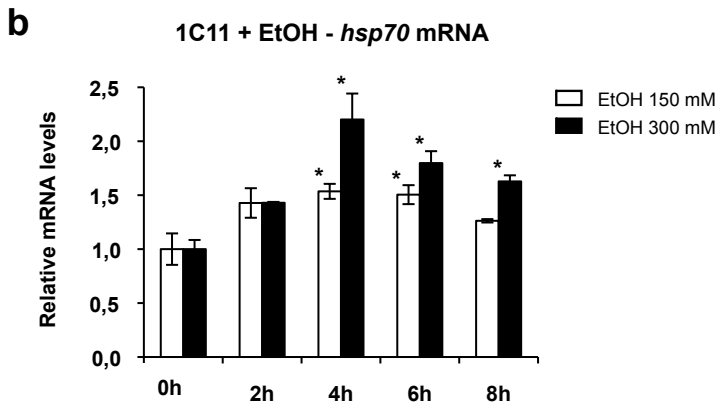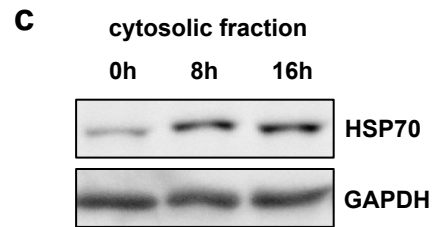

Supplement: 12192_2017_829_MOESM2_ESM.pdf [file 12192_2017_829_MOESM2_ESM.pdf]

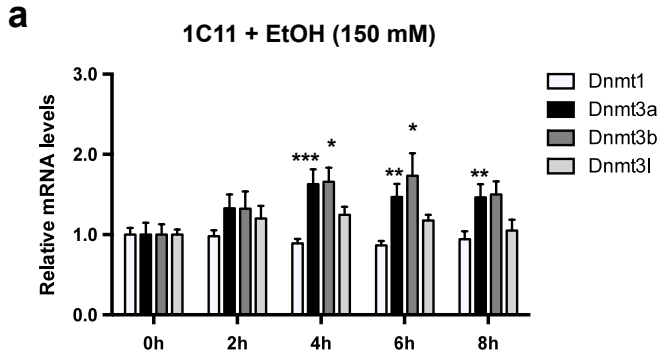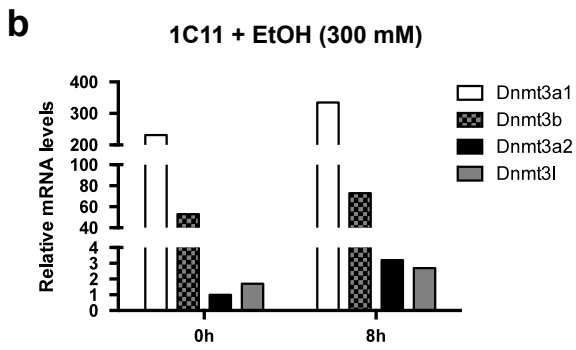

Supplement: 12192_2017_829_MOESM3_ESM.pdf [file 12192_2017_829_MOESM3_ESM.pdf]

# Supplementary Figure S4

Miozzo et al.

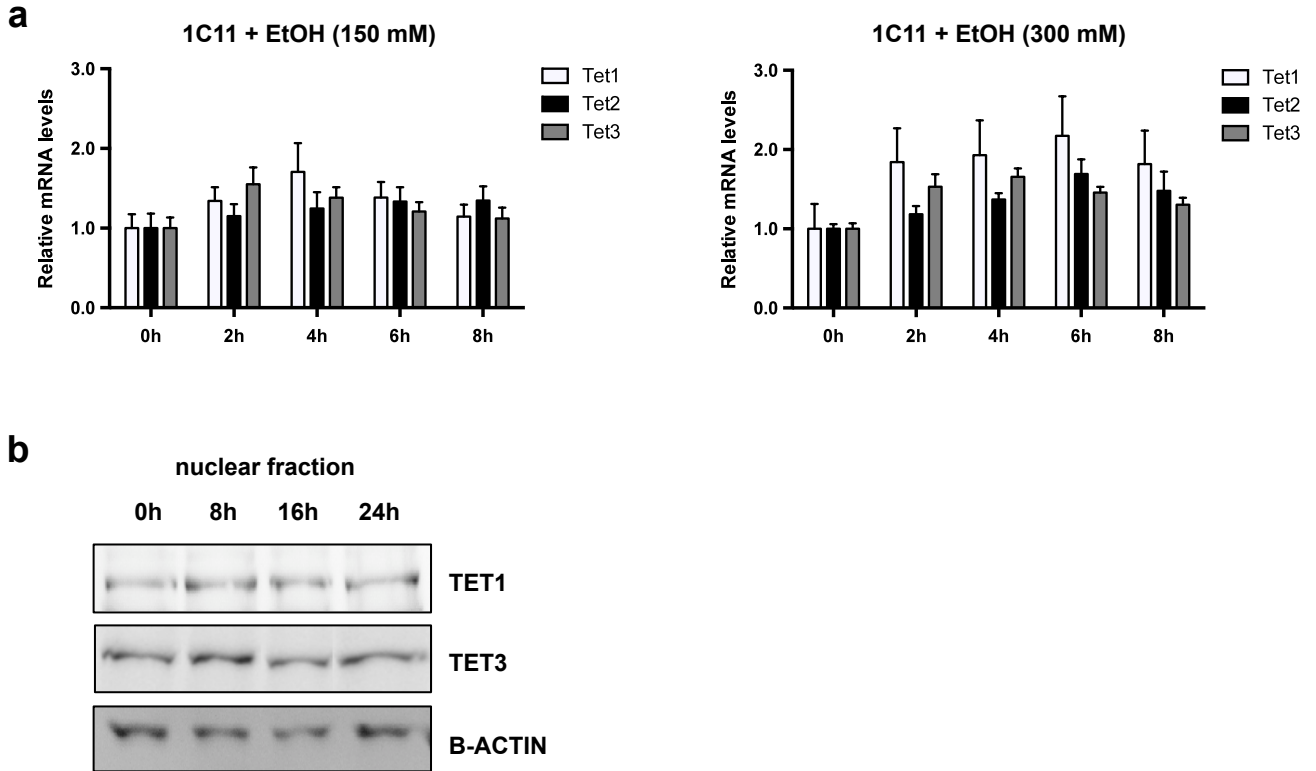

Supplement: 12192_2017_829_MOESM4_ESM.pdf [file 12192_2017_829_MOESM4_ESM.pdf]

# Supplementary Figure S5

Miozzo et al.

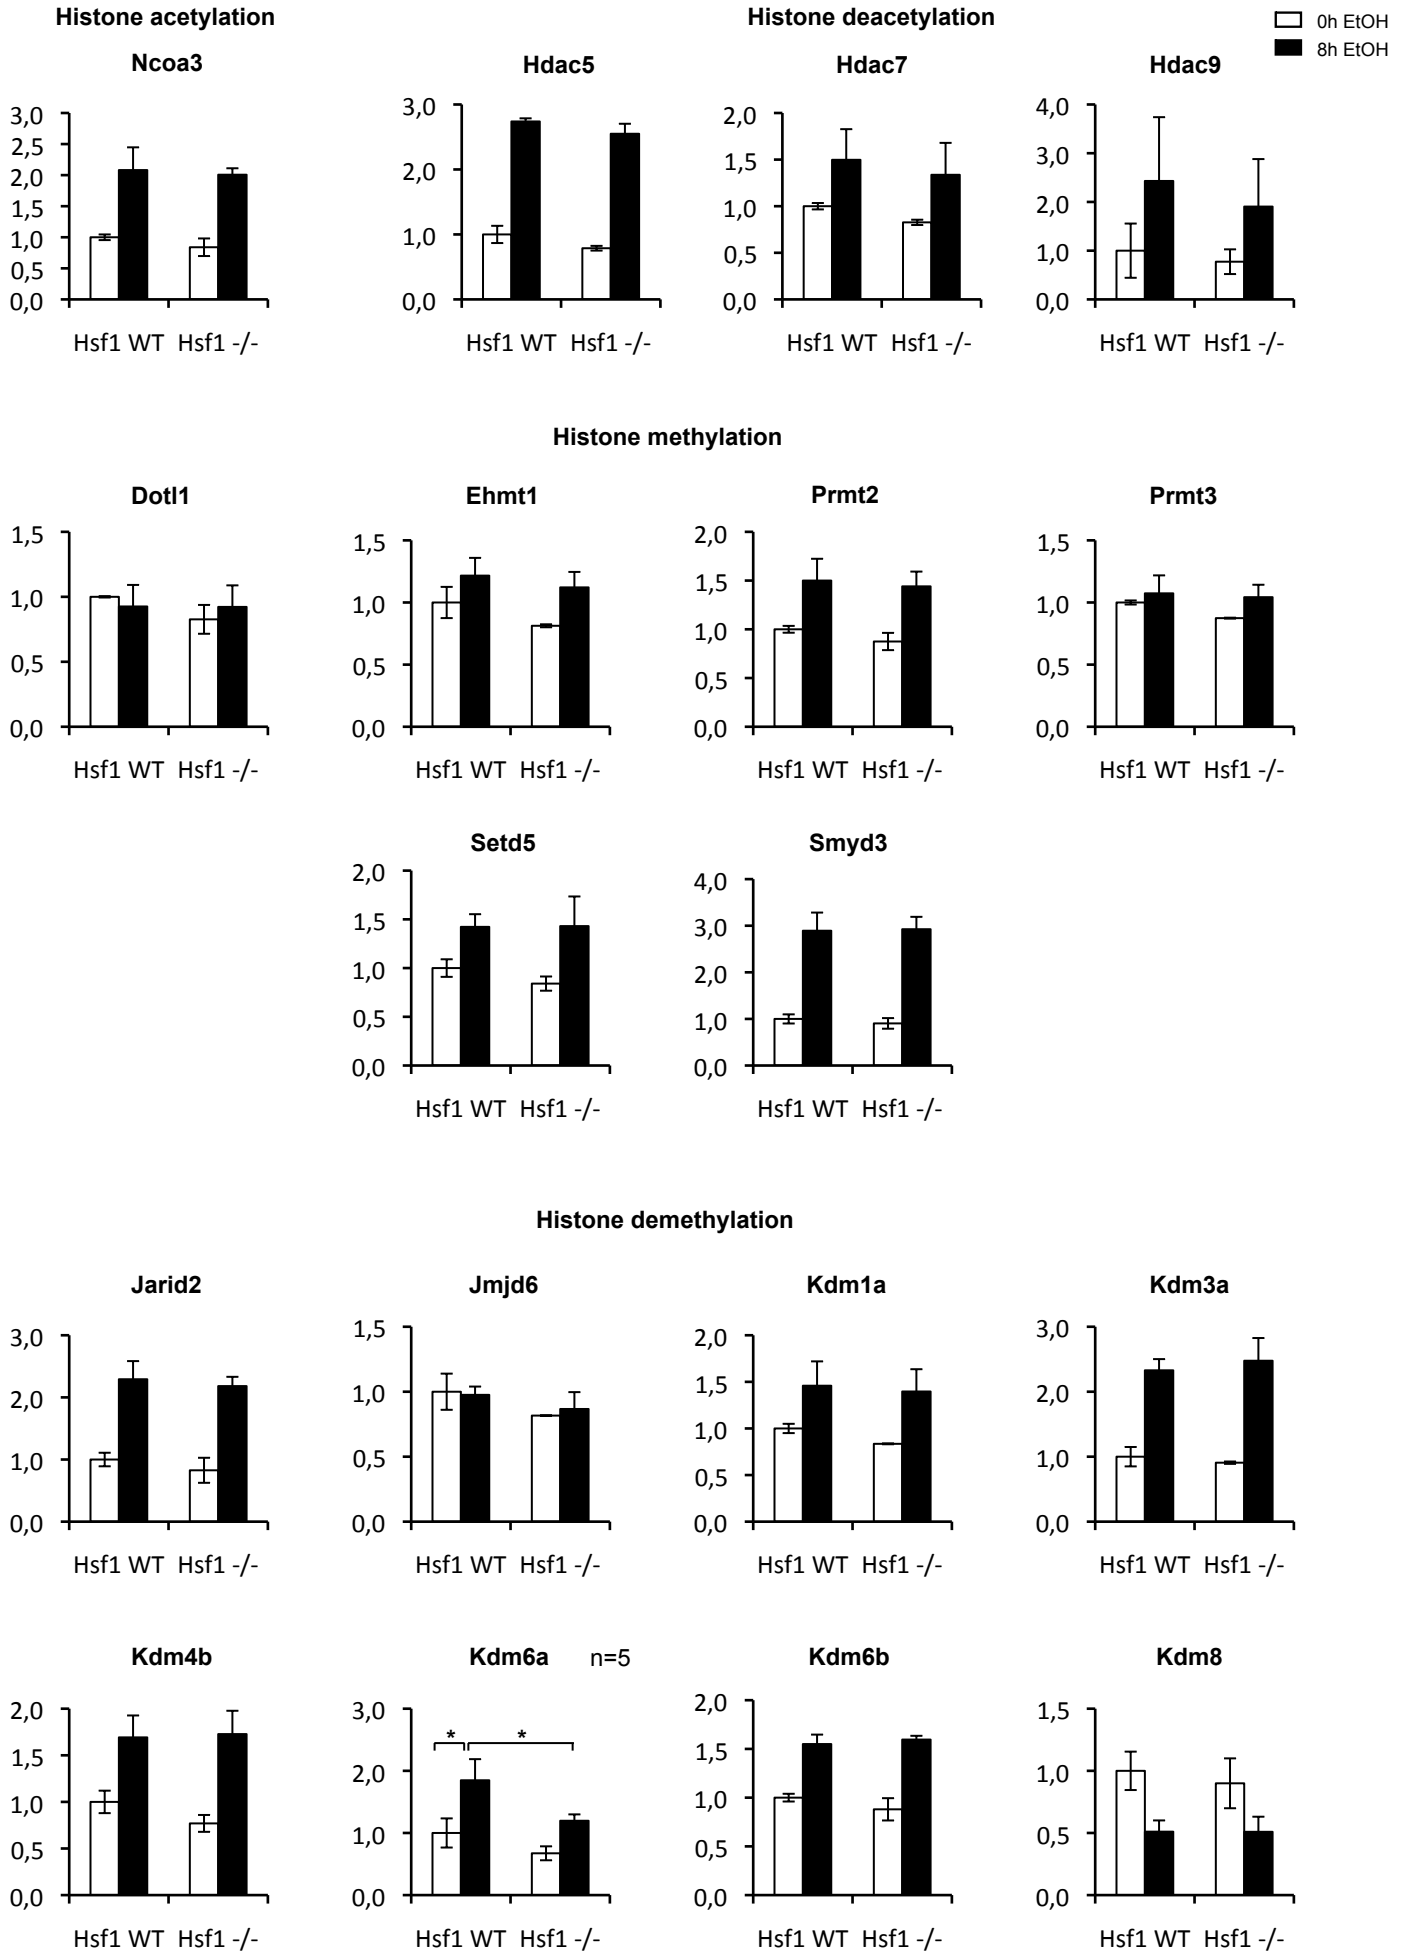

Supplement: 12192_2017_829_MOESM5_ESM.pdf [file 12192_2017_829_MOESM5_ESM.pdf]

**a**

1C11 + EtOH (6h) - *Dnmt3a* mRNA

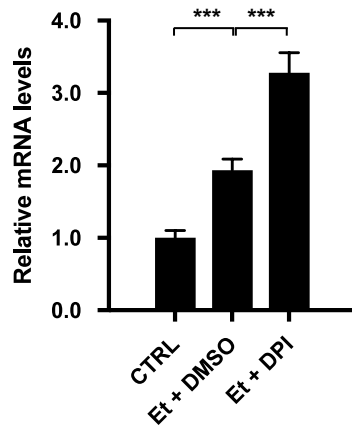

**b**

MEF + EtOH

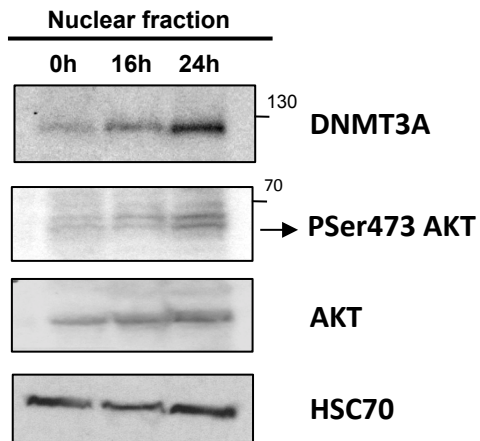

**c**

1C11 + EtOH (16h)

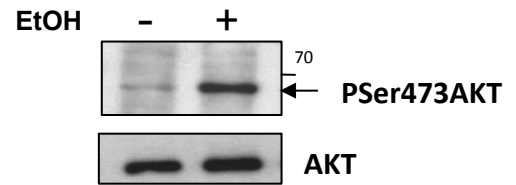

Supplement: 12192_2017_829_MOESM6_ESM.pdf [file 12192_2017_829_MOESM6_ESM.pdf]
